# Supplementary material
Source: PubMed Central journal article supplement (PMC9729420)
Supplement: NIHMS1835996-supplement-1.pdf [file NIHMS1835996-supplement-1.pdf]

**Supplemental Table A.** Comparison of race assigned at randomization with race allocation for racial analysis of primary outcomes.

|  |                                                                                                  |
|--|--------------------------------------------------------------------------------------------------|
|  | <b>Race and ethnicity assignment for outcomes<br/>analysis based on patient survey responses</b> |
|--|--------------------------------------------------------------------------------------------------|

| <b>Race assigned at randomization by research staff based on patient answers to structured questions</b> | Black          | Hispanic    | White          | Other      |
|----------------------------------------------------------------------------------------------------------|----------------|-------------|----------------|------------|
| Black                                                                                                    | 869<br>(91.2%) | 2 (0.4%)    | 8 (0.9%)       | 7 (22.6%)  |
| Hispanic                                                                                                 | 5 (0.6%)       | 465 (92.5%) | 3 (0.4)        | 1 (3.2%)   |
| White                                                                                                    | 9 (0.9%)       | 22 (4.4%)   | 849<br>(98.4%) | 1 (3.2%)   |
| Multiracial                                                                                              | 63 (6.6%)      | 9 (1.7%)    | 1 (0.1%)       | 5 (16.2%)  |
| Other                                                                                                    | 7 (0.7%)       | 5 (1.0%)    | 2 (0.2%)       | 17 (54.8%) |
| <b>Total</b>                                                                                             | <b>953</b>     | <b>503</b>  | <b>863</b>     | <b>31</b>  |

**Supplemental Table B.** Comparison of patient self-reported race and ethnicity with race and ethnicity allocation for outcomes analysis.

|                                                             | <b>Race and Ethnicity Assignment for Outcomes Analysis</b> |             |             |            |
|-------------------------------------------------------------|------------------------------------------------------------|-------------|-------------|------------|
| <b>Patient Self-Reported Race and Ethnicity on Survey 1</b> | Black                                                      | Hispanic    | White       | Other      |
| Black                                                       | 841 (88.3%)                                                | 0 (0%)      | 0 (0%)      | 0 (0%)     |
| Hispanic                                                    | 0 (0%)                                                     | 462 (91.9%) | 0 (0%)      | 0 (0%)     |
| White                                                       | 0 (0%)                                                     | 0 (0%)      | 826 (95.7%) | 0 (0%)     |
| Other single race group                                     | 0 (0%)                                                     | 0 (0%)      | 0 (0%)      | 22 (71.0%) |

|                              |            |            |            |           |
|------------------------------|------------|------------|------------|-----------|
| Biracial <sup>†</sup>        | 89 (9.3%)  | 37 (7.4%)  | 36 (4.2%)  | 6 (19.4%) |
| Multiracial (≥3 race groups) | 1 (0.1%)   | 4 (0.7%)   | 1 (0.1%)   | 3 (9.6%)  |
| <b>Total</b>                 | <b>953</b> | <b>503</b> | <b>863</b> | <b>31</b> |

<sup>†</sup>Biracial (Other) includes patients that selected Black, Hispanic, or White and one other race/ethnicity outside of the previously identified biracial categories (i.e. Black and Native American or White and Asian).
